# Supplementary material
Source: MDPI journal article supplement (https://www.mdpi.com/2073-445X/10/9/925)
Supplement: s1 [file s1]

**Table S1.** Questionnaire for lodge owners/managers.

Village:

Date:

Sheet No.:

This questionnaire is conducted by the student of the Graduate School of Environmental Science of Hokkaido University. Thank you for your time. Contact: [cherrysunyujie@eis.hokudai.ac.jp](mailto:cherrysunyujie@eis.hokudai.ac.jp).

**Questionnaire for lodge owners/managers**

**1. Lodge information:**

Q1-2. Are you the owner of the lodge?

A. Yes.                                  B. No.                                  C. Others (      ).

Q1-3. Are you the manager of the lodge?

A. Yes (If the owner and the manager are the same person, go to Q1-4, if not, go to Q1-5).

B. No (Go to Q1-5).                  C. Others (      ).

Q1-4-2. Do you have a plan to expand the lodge?

A. Yes.                                  B. No.                                  C. Others (                      ).

Q1-5-3. Does the owner have a plan to expand the lodge?

A. Yes.                                  B. No.                                  C. Others (                      ).

Q1-6: Beds, guest rooms and guests' information:

| Type                           | Number |
|--------------------------------|--------|
| Total beds                     |        |
| Room with toilet               |        |
| Room with toilet and shower    |        |
| Room without toilet and shower |        |

**2. Household information:**

Q2. Household information

| Name | Age | Gender | Ethnicity | Occupation | Village |
|------|-----|--------|-----------|------------|---------|
|      |     |        |           |            |         |
|      |     |        |           |            |         |
|      |     |        |           |            |         |
|      |     |        |           |            |         |
|      |     |        |           |            |         |
|      |     |        |           |            |         |

**3. Personal Information:**

Q3-6. What is your primary occupation?

A. Trekking guide.                  B. Climbing guide.                  C. Porter.                                  D. Kitchen staff.  
E. Lodge cook.                      F. Lodge owner.                      G. Lodge employee (lodge manager).                  H. Farmers.  
I. Pastoralists.                      J. Governmental officials.                  K. Teachers.                                  L. Trekking company owner.

M. Others ( ).

N. No occupation.

Q3-13. What is your household income source? (Please answer in percent.)

Tourism ( %) Livestock ( %) Agriculture ( %) Remittance ( %)  
Salary ( %) Others ( %).

### 7. Tourism-related information:

Q7. What is your attitude towards tourism in this Park?

A. Very positive. B. Positive. C. Neutral. D. Negative. E. Very Negative.

Q7-1. What are the perceived benefits in the Park?

A. Increased income from tourism. B. Park conservation. C. Improved living conditions.  
D. No. E. Others ( ).

Q7-2. What are the perceived costs in the Park?

A. Resource restrictions (e.g. Firewood and timber).  
B. Imbalanced development among villages.  
C. Crop losses caused by wildlife (Wildlife's name: ).  
D. No.  
E. Others ( ).

Questions that are not used in the current paper were omitted by the authors. The English version was translated into Nepali before use.
