# Supplementary material
Source: MDPI journal article supplement (https://www.mdpi.com/2073-445X/10/9/925)
Supplement: s1 [file s1]

**Table S3.** Interview sheet with community leaders, national-park officials and school principals

Village:                      Date:                      Sheet No.:

This interview is conducted by the student of the Graduate School of Environmental Science of Hokkaido University.  
Thank you for your time. Contact: [cherrysunyujie@eis.hokudai.ac.jp](mailto:cherrysunyujie@eis.hokudai.ac.jp).

Name:

Age:

Gender:

Ethnicity:

Occupation:

Village:

**Tourism-related information:**

How do you think of the development of tourism in the park?

What is your attitude towards tourism in this park?

What are the perceived benefits in the park?

What are the perceived costs in the park?

Do you see imbalanced development in the park?

If so, how do you think of the imbalanced development in the park?

Do you see unequal benefits in the park?

If so, how do you think of the unequal benefits in the park?

**Community-related information:**

Do you have any organizations in your community to improve tourism development?

Do you know what kind of activities has been conducted to improve tourism development?

Questions that are not used in the current paper were omitted by the authors. The English version was translated into Nepali before use.
