# Supplementary material
Source: MDPI journal article supplement (https://www.mdpi.com/2073-445X/10/9/925)
Supplement: s1 [file s1]

**Table S2.** Questionnaire for other tourism-related facilities.

Village:

Date:

Sheet No.:

This questionnaire is conducted by the student of the Graduate School of Environmental Science of Hokkaido University.

Thank you for your time. Contact: [cherrysunyujie@eis.hokudai.ac.jp](mailto:cherrysunyujie@eis.hokudai.ac.jp).

**Questionnaire for other tourism-related facilities**

**1. Household information:**

| Name | Age | Gender | Ethnicity | Occupation | Village |
|------|-----|--------|-----------|------------|---------|
|      |     |        |           |            |         |
|      |     |        |           |            |         |
|      |     |        |           |            |         |
|      |     |        |           |            |         |
|      |     |        |           |            |         |
|      |     |        |           |            |         |

**2. Personal information:**

Q2-4. Are you renting the porterhouse/teashop/shop from local people?

A. Yes (Go to Q2-6).      B. No (Go to Q2-5).      C. Others (      ).

Q2-5. Did you build your own house here?

A. Yes (Go to Q2-6).      B. No (Go to Q2-5-1).      C. Others (      ).

Q2-5-1. Did you buy the house here?

A. Yes (Go to Q2-6).      B. No (Go to Q2-7).      C. Others (      ).

**3. Personal occupation information.**

Q3-1. What is your primary occupation?

A. Trekking guide.    B. Climbing guide.    C. Porter.    D. Kitchen staff.    E. Lodge cook.  
F. Lodge owner.    G. Lodge employee.    H. Farmers.    I. Pastoralists.  
J. Governmental officials.    K. Teachers.    L. Others (      ).    M. No occupation.

Q3-8. What is your household income source? (Please answer in percent.)

Tourism (    %)      Livestock (    %)      Agriculture (    %)      Remittance (    %)  
Others (      %).

**6. Tourism-Related information:**

Q6-1. What is your attitude towards tourism in this Park?

A. Very positive.    B. Positive.    C. Neutral.    D. Negative.    E. Very Negative.

Q6-2. What are the perceived benefits in the Park?

A. Increased income from tourism.    B. Park conservation.    C. Improved living conditions.

D. No.

E. Others ( ).

Q6-3. What are the perceived costs in the Park?

A. Resource restrictions (e.g. Firewood and timber).

B. Imbalanced development among villages.

C. Crop losses caused by wildlife (Wildlife's name: ).

D. No.

E. Others ( ).

Questions that are not used in the current paper were omitted by the authors. The English version was translated into Nepali before use.
